# Supplementary material for: Merkel Cell Polyomavirus in the Context of Oral Squamous Cell Carcinoma and Oral Potentially Malignant Disorders
Source: MDPI journal article supplement (doi:10.3390/biomedicines12040709), 2024-03-22
Supplement: s1 [file s1]

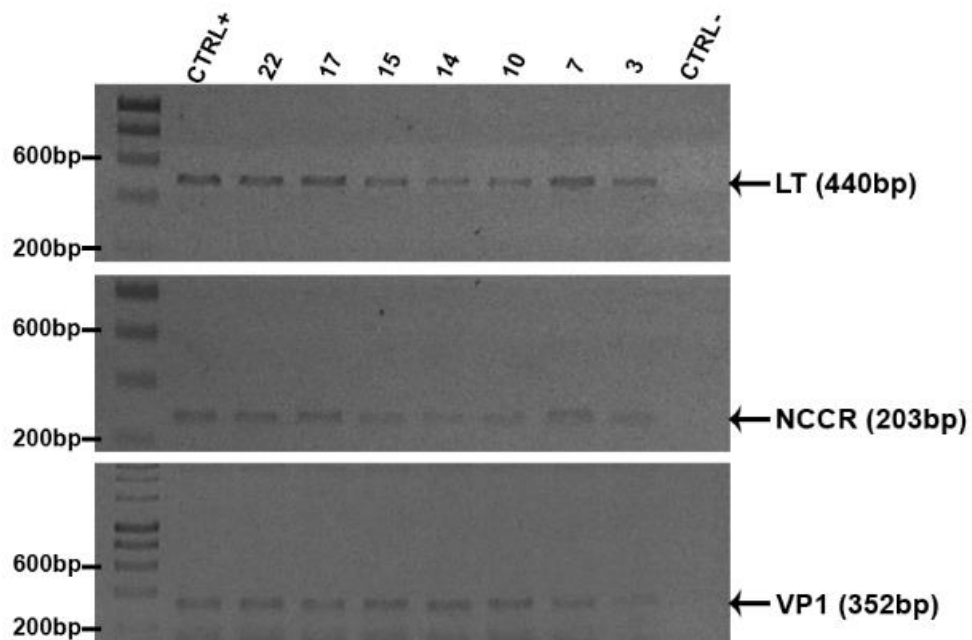

**Figure S1.** Representative results for the detection of MCPyV genome by PCR. The LT1, NCCR and VP1 primers produced amplicons of 440, 203 and 352 bp. CTRL+: positive control, CTRL-: water as the negative control. Molecular weights are indicated on the left.
